# Supplementary material for: Malleability of rumination: An exploratory model of CBT-based plasticity and long-term reduced risk for depressive relapse among youth from a pilot randomized clinical trial
Source: PubMed Central journal article supplement (PMC7299403; doi:10.1371/journal.pone.0233539), 2020-06-17
Supplement: pone.0233539.s006.pdf [file pone.0233539.s006.pdf]

**S2 Fig. Average activation correlation across second and third rumination blocks from pDMN+ and SV-SM.**

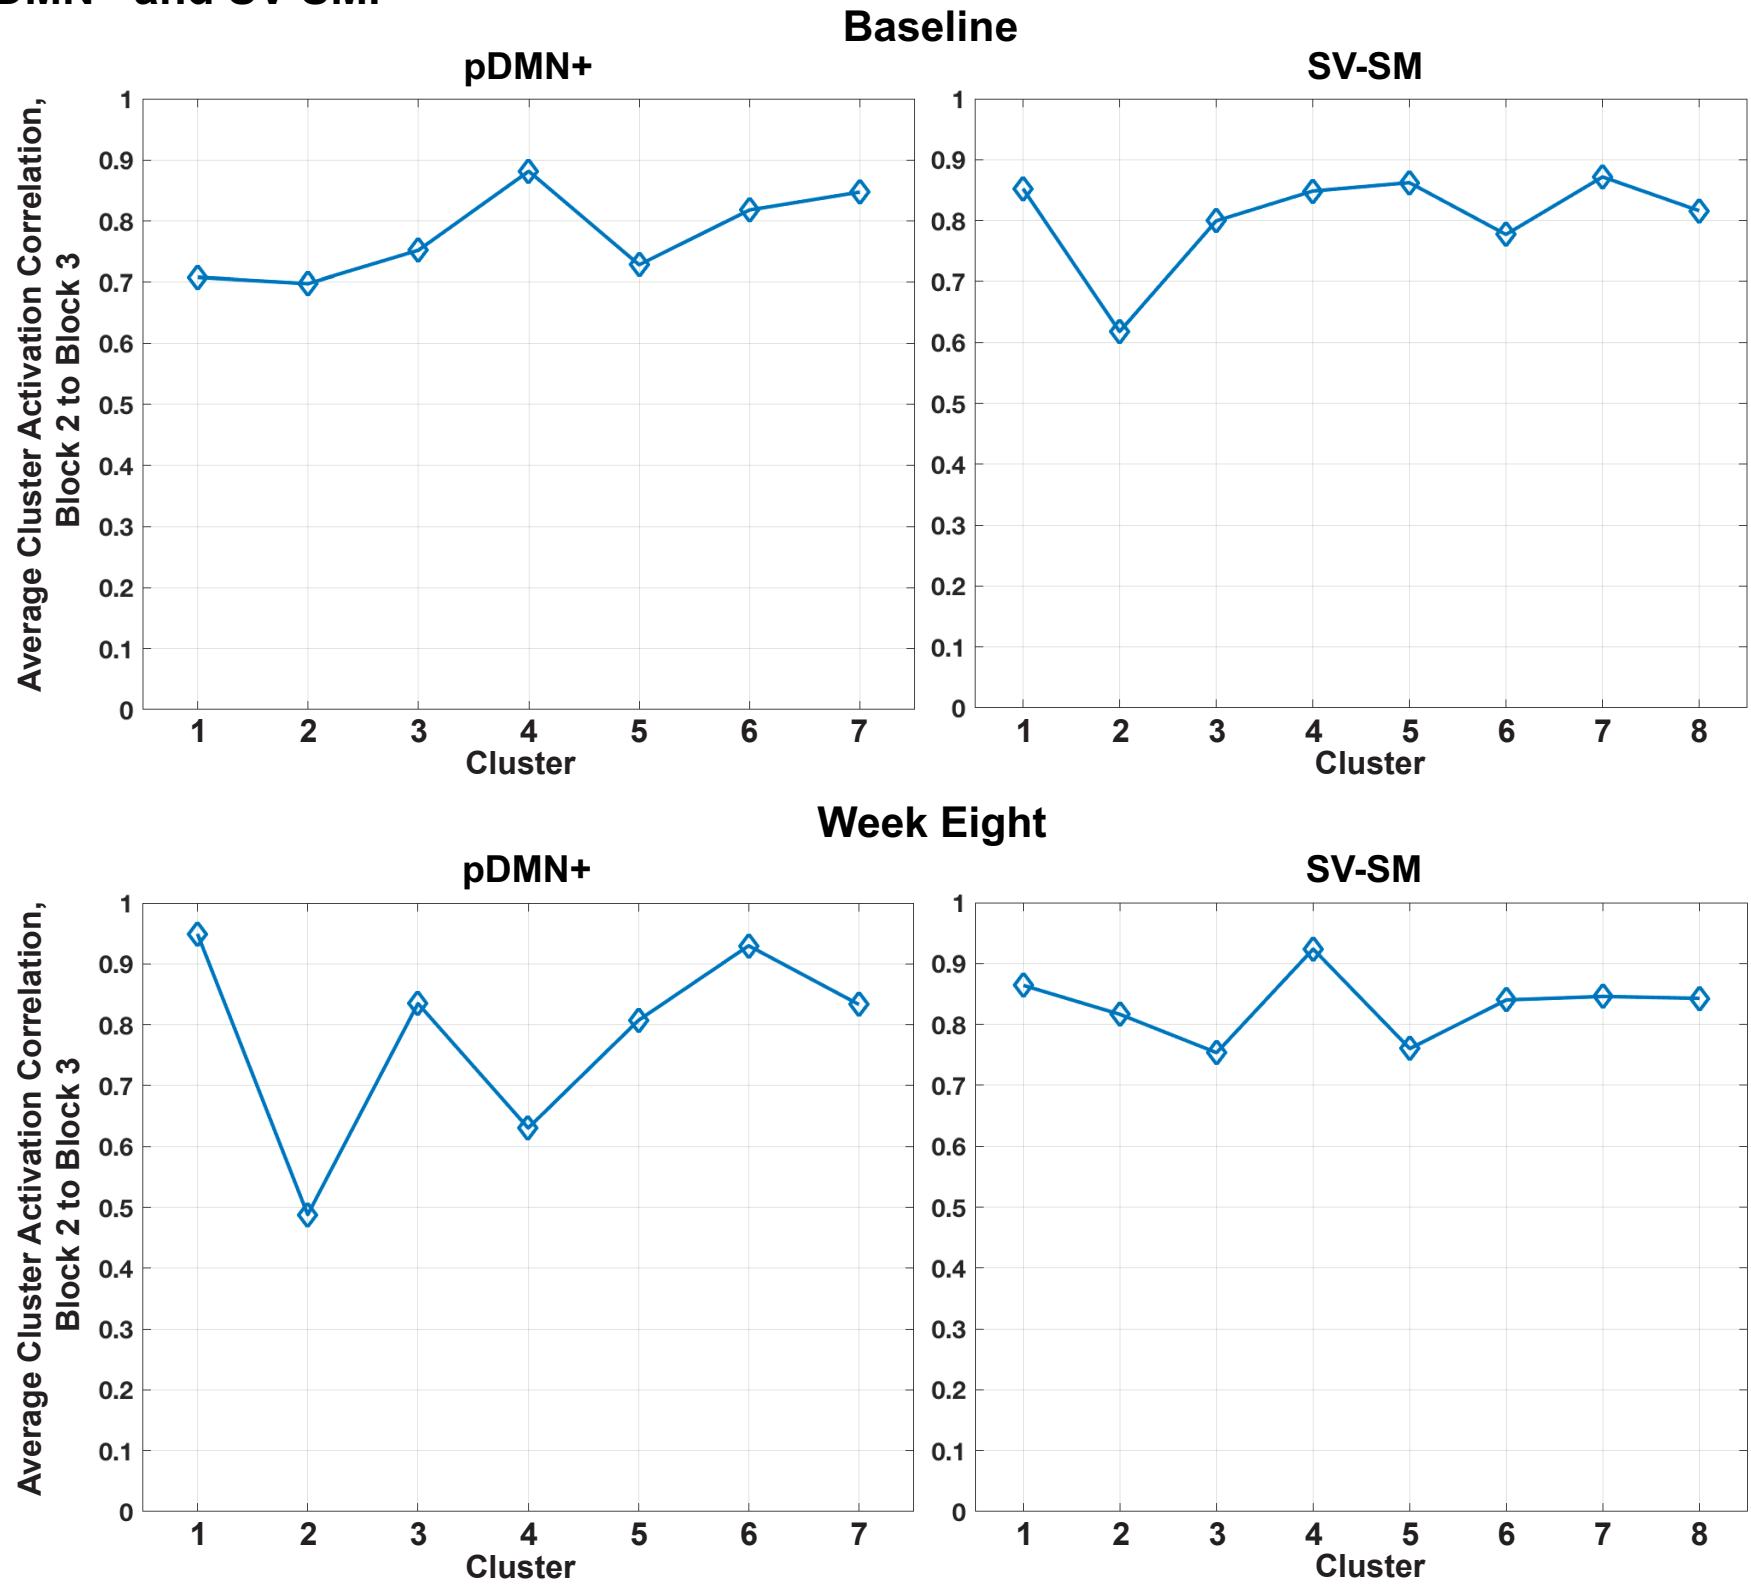

| Cluster # | pDMN+                         | SV-SM               |
|-----------|-------------------------------|---------------------|
| 1         | Thalamus/putamen/amygdala/PHG | Cingulate, Frontal  |
| 2         | Precuneus, Parietal           | Lingual, Occipital  |
| 3         | Lingual, Occipital            | Middle, Temporal    |
| 4         | Fusiform, Temporal            | Precentral, Frontal |
| 5         | Precuneus, Parietal           | Insula, Subcortical |
| 6         | Superior, Temporal            | Inferior, Occipital |
| 7         | Inferior, Parietal            | Precentral, Frontal |
| 8         |                               | Precentral, Frontal |
