# Supplementary material for: Malleability of rumination: An exploratory model of CBT-based plasticity and long-term reduced risk for depressive relapse among youth from a pilot randomized clinical trial
Source: PubMed Central journal article supplement (PMC7299403; doi:10.1371/journal.pone.0233539), 2020-06-17

**S4 Fig. Predicted estimates for brooding subscale of RRS across two years of longitudinal follow-up.**

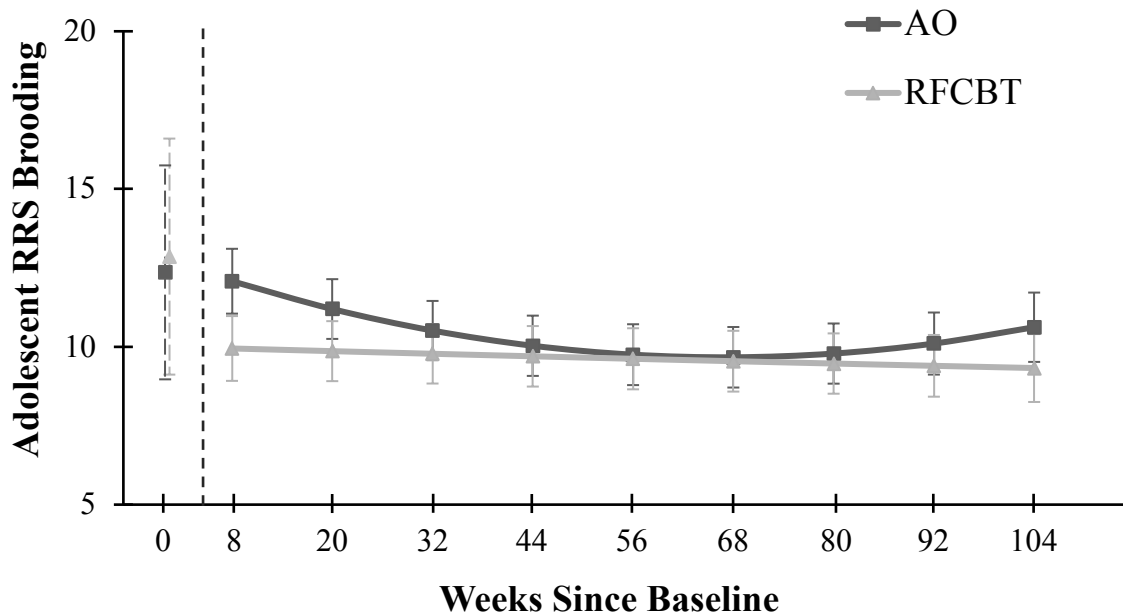

Supplement: pone.0233539.s008.pdf [file pone.0233539.s008.pdf]
